# Supplementary material for: The effect of impurities on the structure and energy of a crystal surface: Mg impurities in calcite as a case study
Source: Royal Society of Chemistry journal article supplement (doi:10.1039/c8ce00750k), 2018-01-01
Supplement: c8ce00750k1.xlsx [file c8ce00750k1.xlsx]

## Sheet: Table S1
Table S1. d10.4 spacing in calcite and Mg-doped (10.4) slabs
	d10.4 (Å)
layer	calcite	1Mg in l1	Dd%	1Mg in l2	Dd%	1Mg in l3	Dd%	1Mg in l4	Dd%	1Mg in l5	Dd%	1Mg in l6	Dd%		< … >	< … >	< … >
1	2.93931	2.84105	-3.34281	2.93008	-0.314116	2.95258	0.451342	3.03002	3.08597	2.94193	0.0892443	3.00468	2.22393		-0.166229	-1.76433	3.01633
2	3.08344	3.12115	1.22311	3.02626	-1.85429	3.02696	-1.83165	3.00602	-2.51085	3.0915	0.261294	3.03305	-1.63419
3	2.99447	2.96706	-0.915248	3.00271	0.275146	2.98146	-0.434484	3.01885	0.81419	2.99307	-0.0468196	3.05159	1.90762
4	3.06587	3.08968	0.776565	3.06911	0.105565	3.04236	-0.767068	2.99068	-2.45254	3.02541	-1.31997	3.02828	-1.22607
5	3.00865	2.99188	-0.557392	3.00994	0.0428209	3.03	0.709564	3.03558	0.894808	2.98253	-0.868439	3.00137	-0.24219
6	3.05448	3.07061	0.527967	3.06117	0.219022	3.04629	-0.26813	3.0461	-0.274405	3.04243	-0.394557	3.00459	-1.63339
<…>	3.02437	3.01357	-0.357007	3.01655	-0.258757	3.01327	-0.366914	3.02121	-0.104625	3.01281	-0.382286	3.02059	-0.124908
	d10.4 (Å)
layer	calcite	3Mg(A) in l1	Dd%	3Mg(A) in l2	Dd%	3Mg(A) in l3	Dd%	3Mg(A) in l4	Dd%	3Mg(A) in l5	Dd%	3Mg(A) in l6	Dd%		< … >	< … >	< … >
1	2.93931	2.70414	-8.00088	2.86353	-2.57799	2.96489	0.870159	3.06292	4.20557	2.92844	-0.369786	3.07319	4.55466		-1.58226	-4.2781	2.99512
2	3.08344	3.1555	2.33718	2.95368	-4.20833	2.92968	-4.98665	2.97414	-3.54482	3.11962	1.17355	2.959	-4.03583
3	2.99447	2.94144	-1.77078	2.97959	-0.496977	2.93479	-1.993	2.95269	-1.3951	2.97591	-0.619765	3.12622	4.39971
4	3.06587	3.11699	1.66738	3.09905	1.08195	2.998	-2.21383	2.92686	-4.53437	2.95603	-3.58287	2.97109	-3.09173
5	3.00865	2.97043	-1.2705	2.98976	-0.628022	3.0831	2.47431	3.00668	-0.065644	2.92242	-2.86607	2.95562	-1.7628
6	3.05448	3.09605	1.36095	3.08681	1.05839	3.00733	-1.5438	3.08688	1.06063	3.02156	-1.07792	2.93029	-4.06594
<…>	3.02437	2.99743	-0.890904	2.9954	-0.95785	2.9863	-1.25893	3.0017	-0.749796	2.98733	-1.22474	3.00257	-0.721018
	d10.4 (Å)
layer	calcite	3Mg(B) in l1	Dd%	3Mg(B) in l2	Dd%	3Mg(B) in l3	Dd%	3Mg(B) in l4	Dd%	3Mg(B) in l5	Dd%	3Mg(B) in l6	Dd%		< … >	< … >	< … >
1	2.93931	2.73748	-6.86644	2.85868	-2.74303	2.93438	-0.167885	3.06227	4.18334	2.93267	-0.225807	3.06976	4.43823		-1.63226	-4.12083	2.99471
2	3.08344	3.1249	1.34448	2.9577	-4.07782	2.95187	-4.26693	2.97515	-3.51198	3.11486	1.01908	2.96465	-3.85265
3	2.99447	2.96479	-0.991105	2.97414	-0.678874	2.92005	-2.48525	2.95314	-1.38003	2.9772	-0.576624	3.1222	4.2657
4	3.06587	3.09324	0.892654	3.103	1.21082	3.01387	-1.6963	2.92791	-4.49999	2.95184	-3.71938	2.97548	-2.94854
5	3.00865	2.98948	-0.637107	2.98592	-0.755488	3.07039	2.05197	3.00595	-0.0899627	2.92388	-2.81754	2.95354	-1.83194
6	3.05448	3.07467	0.660832	3.08941	1.14356	3.01914	-1.15699	3.08707	1.06674	3.01598	-1.26066	2.93298	-3.97792
<…>	3.02437	2.99743	-0.890895	2.99481	-0.977446	2.98495	-1.30348	3.00191	-0.742525	2.98607	-1.26632	3.0031	-0.703319
	d10.4 (Å)
layer	calcite	6Mg in l1	Dd%	6Mg in l2	Dd%	6Mg in l3	Dd%	6Mg in l4	Dd%	6Mg in l5	Dd%	6Mg in l6	Dd%		< … >	< … >	< … >
1	2.93931	2.35551	-19.8618	2.74635	-6.56489	2.85787	-2.77063	3.09084	5.15517	2.87646	-2.13836	3.09943	5.44742		-3.76262	-8.82112	2.95468
2	3.08344	3.2562	5.60287	2.86835	-6.97547	2.86984	-6.92743	2.9592	-4.02914	3.15927	2.45922	2.92678	-5.0805
3	2.99447	2.86375	-4.36551	2.88822	-3.54816	2.80227	-6.41846	2.83684	-5.26409	2.91349	-2.70413	3.16286	5.62346
4	3.06587	3.1613	3.11258	3.19591	4.24131	3.00408	-2.01543	2.86098	-6.68299	2.84378	-7.24401	2.94749	-3.86152
5	3.00865	2.93205	-2.54627	2.87958	-4.29007	3.09387	2.83244	2.8985	-3.66116	2.81366	-6.48119	2.84166	-5.55027
6	3.05448	3.11964	2.1332	3.19965	4.75241	3.01022	-1.44896	3.19738	4.67837	2.97954	-2.45361	2.85573	-6.50683
<…>	3.02437	2.94807	-2.52275	2.96301	-2.02893	2.93969	-2.79986	2.97396	-1.66693	2.93103	-3.08622	2.97233	-1.72087

## Sheet: Table S2
Table S2. Cation-cation distances in calcite and Mg-doped (10.4) slabs
	1Mg in l1	1Mg in l2	1Mg in l3	1Mg in l4	1Mg in l5	1Mg in l6
cation―cation (Å)	3.795	3.826	3.867	3.855	3.867	3.851
	3.888	3.816	3.841	3.843	3.854	3.852
	3.799	3.856	3.923	3.897	3.948	3.948
		3.878	3.937	3.904	3.946	3.949
<cation―cation (Å)>	3.82733	3.844	3.892	3.87475	3.90375	3.9
	3Mg(A) in l1	3Mg(A) in l2	3Mg(A) in l3	3Mg(A) in l4	3Mg(A) in l5	3Mg(A) in l6
cation―cation (Å)	4.002	3.999	4.021	4.003	4.022	3.997
	4.06	4.014	4.008	3.993	4.013	3.99
	3.794	3.905	3.844	3.92	3.849	3.85
		3.818	3.833	3.918	3.863	3.861
<cation―cation (Å)>	3.952	3.934	3.9265	3.9585	3.93675	3.9245
	3Mg(B) in l1	3Mg(B) in l2	3Mg(B) in l3	3Mg(B) in l4	3Mg(B) in l5	3Mg(B) in l6
cation―cation (Å)	3.816	3.831	3.853	3.939	3.987	3.885
	3.509	3.887	3.869	3.891	3.834	3.849
	4.41	3.796	3.81	3.819	3.858	3.814
	3.988	3.847	3.916	3.88	3.858	3.906
	3.456	3.862	3.848	3.885	3.903	3.894
	3.865	3.8	3.898	3.838	3.881	3.822
	3.772	3.827	3.829	3.892	3.85	3.86
	4.131	3.911	3.884	3.929	3.882	3.882
	3.966	3.969	3.986	3.969	3.985	3.963
	3.988	3.928	4.008	3.97	3.993	3.996
		4.026	3.997	4.04	3.994	4
		4.261	4.222	4.197	4.218	4.198
		3.947	3.99	4.015	3.996	3.997
		4.038	3.997	4.01	3.992	3.993
		4.252	4.221	4.196		4.199
		3.966				4.007
		4.017				3.99
<cation―cation (Å)>	3.8901	3.95088	3.9552	3.96467	3.68207	3.95618
	6Mg in l1	6Mg in l2	6Mg in l3	6Mg in l4	6Mg in l5	6Mg in l6
cation―cation (Å)	4.06	3.716	4.041	3.975	4.037	3.982
	3.643	3.725	3.793	3.717	3.79	3.713
	4.06	3.974	3.708	3.963	3.693	3.815
	3.981	3.889	4.04	3.975	4.037	3.982
		3.724	3.971	3.718	3.971	3.968
		3.973	3.703	3.814	3.693	3.712
		3.716				3.981
		3.725				3.713
		3.973				3.968
		3.889
		3.725
		3.973
<cation―cation (Å)>	3.936	3.8335	3.876	3.86033	3.87017	3.87044
calcite	l1	l2	l3	l4	l5	l6
cation―cation (Å)	4.034	4.031	4.031	4.031	4.031	4.031
	4.028	4.031	4.031	4.031	4.031	4.031
	3.989	4.065	4.041	4.041	4.044	4.051
		3.989	4.065	4.053	4.053	4.044
<cation―cation (Å)>	4.017	4.029	4.042	4.039	4.03975	4.03925

## Sheet: Table S3
Table S3
	Potential energy of the layers in calcite and Mg-doped (10.4) slabs (eV)
layer	calcite	1Mg in L1	DE%	1Mg in L2	DE%	1Mg in L3	DE%	1Mg in L4	DE%	1Mg in L5	DE%	1Mg in L6	DE%		< … >	< … >
1	-251.727	-254.541	-1.11755	-251.841	-0.0452423	-251.72	0.00304433	-251.784	-0.0224739	-251.741	-0.00524141	-251.762	-0.0138586		-0.0220655	-1.08814
2	-255.849	-255.898	-0.0193807	-258.65	-1.09492	-255.895	-0.0180953	-255.829	0.00768469	-255.844	0.00200753	-255.85	-0.000471925
3	-255.648	-255.618	0.0114716	-255.709	-0.0239302	-258.432	-1.08916	-255.699	-0.0199635	-255.631	0.00670488	-255.649	-0.000498945
4	-255.779	-255.793	-0.00547958	-255.751	0.0108203	-255.816	-0.0144069	-258.514	-1.06925	-255.818	-0.0152804	-255.738	0.0160219
5	-255.732	-255.717	0.00589364	-255.738	-0.00214865	-255.73	0.000897155	-255.802	-0.0272183	-258.5	-1.08217	-255.791	-0.023082
6	-255.768	-255.776	-0.00326216	-255.759	0.00324809	-255.75	0.00701066	-255.725	0.0167311	-255.806	-0.0151114	-258.519	-1.07581
7	-255.739	-255.73	0.00349226	-255.741	-0.000808128	-255.75	-0.0044789	-255.747	-0.00336027	-255.727	0.00454192	-255.792	-0.0210094
8	-255.763	-255.768	-0.0021266	-255.758	0.00192025	-255.751	0.00463426	-255.747	0.00601933	-255.75	0.00489119	-255.732	0.0119481
9	-255.743	-255.737	0.00230689	-255.743	0.000227467	-255.75	-0.00271792	-255.747	-0.00164467	-255.749	-0.00227913	-255.742	0.000358878
10	-255.759	-255.762	-0.00134095	-255.756	0.00109553	-255.751	0.002964	-255.749	0.00392201	-255.752	0.0029193	-255.753	0.00220715
11	-255.747	-255.743	0.00156628	-255.744	0.00091053	-255.75	-0.00128128	-255.747	-0.000157001	-255.75	-0.00130573	-255.745	0.000797574
12	-255.756	-255.758	-0.000801813	-255.754	0.000699853	-255.751	0.00175693	-255.749	0.00261814	-255.751	0.00177381	-255.753	0.00116301
13	-255.749	-255.747	0.00103464	-255.747	0.0011127	-255.75	-0.00023479	-255.747	0.000896409	-255.75	-0.000428988	-255.746	0.00119346
14	-255.754	-255.754	-0.000241129	-255.752	0.000703226	-255.751	0.00101567	-255.749	0.00183832	-255.751	0.00106382	-255.751	0.000967206
15	-255.752	-255.751	0.000345126	-255.75	0.000797118	-255.751	0.000391483	-255.749	0.00129064	-255.751	0.00035703	-255.749	0.00101511
layer	calcite	3Mg(A) in L1	DE%	3Mg(A) in L2	DE%	3Mg(A) in L3	DE%	3Mg(A) in L4	DE%	3Mg(A) in L5	DE%	3Mg(A) in L6	DE%		< … >	< … >
1	-251.727	-259.924	-3.25621	-252.04	-0.124243	-251.733	-0.00224732	-251.841	-0.0450545	-251.759	-0.0126423	-251.854	-0.0503814		-0.0744104	-3.15245
2	-255.849	-255.992	-0.055918	-263.88	-3.13906	-256.005	-0.0610815	-255.822	0.0103116	-255.837	0.00458046	-255.871	-0.00874785
3	-255.648	-255.586	0.0242875	-255.844	-0.0769009	-263.693	-3.14701	-255.824	-0.0689099	-255.62	0.0108866	-255.633	0.00570137
4	-255.779	-255.797	-0.00729061	-255.73	0.018883	-255.934	-0.0608523	-263.757	-3.11911	-255.943	-0.0643424	-255.688	0.0353075
5	-255.732	-255.71	0.00864963	-255.731	0.000631774	-255.722	0.00399211	-255.938	-0.080417	-263.741	-3.13178	-255.941	-0.0817852
6	-255.768	-255.774	-0.00272002	-255.758	0.00358951	-255.734	0.0130497	-255.698	0.0271118	-255.933	-0.0645718	-263.751	-3.12156
7	-255.739	-255.724	0.00566377	-255.73	0.0034121	-255.758	-0.00764232	-255.742	-0.00126607	-255.716	0.00877368	-255.942	-0.0794925
8	-255.763	-255.767	-0.00154561	-255.758	0.00193559	-255.734	0.0111555	-255.744	0.00734015	-255.737	0.0101151	-255.692	0.0278819
9	-255.743	-255.732	0.00440346	-255.732	0.00431131	-255.757	-0.00527097	-255.737	0.0024519	-255.754	-0.00439116	-255.744	-0.000450194
10	-255.759	-255.761	-0.000723359	-255.755	0.00151775	-255.738	0.00831863	-255.747	0.00460326	-255.738	0.00822561	-255.738	0.00825364
11	-255.747	-255.738	0.00351099	-255.735	0.00457142	-255.754	-0.00271116	-255.736	0.00402582	-255.753	-0.00261064	-255.739	0.00308252
12	-255.756	-255.756	1.25432e-05	-255.752	0.00151376	-255.741	0.00593675	-255.747	0.00349583	-255.741	0.00584992	-255.742	0.00550272
13	-255.749	-255.743	0.00268968	-255.738	0.00434737	-255.751	-0.000527002	-255.737	0.0047646	-255.751	-0.000458908	-255.737	0.00479971
14	-255.754	-255.752	0.000803246	-255.748	0.00217178	-255.743	0.00400391	-255.745	0.00331729	-255.744	0.00392457	-255.743	0.00430923
15	-255.752	-255.747	0.00172696	-255.745	0.00284132	-255.747	0.00186834	-255.743	0.00359205	-255.747	0.0018397	-255.741	0.00409229
layer	calcite	3Mg(B) in L1	DE%	3Mg(B) in L2	DE%	3Mg(B) in L3	DE%	3Mg(B) in L4	DE%	3Mg(B) in L5	DE%	3Mg(B) in L6	DE%		< … >	< … >
1	-251.727	-259.849	-3.22651	-252.071	-0.136363	-251.703	0.00989939	-251.835	-0.0427277	-251.76	-0.0128748	-251.851	-0.0489199		-0.0774103	-3.09491
2	-255.849	-255.961	-0.0439995	-263.758	-3.09141	-256.024	-0.0683235	-255.812	0.0143001	-255.832	0.0064527	-255.868	-0.00751842
3	-255.648	-255.595	0.0207156	-255.852	-0.0798127	-263.517	-3.0782	-255.829	-0.0710203	-255.612	0.0140865	-255.63	0.00681465
4	-255.779	-255.792	-0.00529359	-255.733	0.0179591	-255.949	-0.0667239	-263.581	-3.05059	-255.948	-0.0661513	-255.679	0.0388377
5	-255.732	-255.716	0.00644355	-255.729	0.00138219	-255.713	0.0075704	-255.95	-0.0853348	-263.575	-3.06661	-255.948	-0.0843626
6	-255.768	-255.775	-0.00284039	-255.76	0.00284465	-255.738	0.0115945	-255.692	0.0295371	-255.94	-0.0674488	-263.584	-3.05615
7	-255.739	-255.729	0.00361559	-255.728	0.00396453	-255.756	-0.00675291	-255.739	-1.56801e-05	-255.706	0.0126462	-255.948	-0.0819734
8	-255.763	-255.768	-0.0020102	-255.759	0.00149973	-255.738	0.00972486	-255.744	0.00727459	-255.735	0.010938	-255.684	0.0307103
9	-255.743	-255.737	0.00253719	-255.731	0.0046661	-255.755	-0.00466668	-255.736	0.00272627	-255.753	-0.00404737	-255.738	0.00188314
10	-255.759	-255.763	-0.00137988	-255.756	0.00112179	-255.741	0.00706372	-255.747	0.00454085	-255.738	0.0083662	-255.74	0.00751889
11	-255.747	-255.742	0.00180768	-255.734	0.0047828	-255.753	-0.00233403	-255.736	0.00407621	-255.753	-0.00253274	-255.736	0.00405062
12	-255.756	-255.758	-0.000828726	-255.753	0.00132097	-255.743	0.00492248	-255.747	0.00343192	-255.741	0.00588543	-255.744	0.0048162
13	-255.749	-255.746	0.00127096	-255.738	0.00443061	-255.75	-0.000408771	-255.737	0.00473821	-255.751	-0.000541665	-255.736	0.00524021
14	-255.754	-255.754	-0.000275097	-255.748	0.00199623	-255.745	0.00325044	-255.745	0.00323611	-255.743	0.00401865	-255.743	0.00395954
15	-255.752	-255.751	0.000417489	-255.745	0.00285443	-255.748	0.00149712	-255.743	0.00362529	-255.747	0.00183444	-255.741	0.00420863
layer	calcite	6Mg in L1	DE%	6Mg in L2	DE%	6Mg in L3	DE%	6Mg in L4	DE%	6Mg in L5	DE%	6Mg in L6	DE%		< … >	< … >
1	-251.727	-268.475	-6.65322	-252.445	-0.284872	-251.768	-0.0162402	-251.977	-0.099309	-251.763	-0.0142447	-251.935	-0.0823101		-0.142462	-6.15989
2	-255.849	-255.951	-0.0400063	-271.42	-6.08627	-256.152	-0.118673	-255.822	0.0103213	-255.829	0.0077214	-255.892	-0.0169102
3	-255.648	-255.475	0.0676485	-255.999	-0.137372	-271.18	-6.07571	-256.004	-0.139573	-255.68	-0.012818	-255.622	0.0101444
4	-255.779	-255.863	-0.0328232	-255.708	0.0275207	-256.085	-0.119583	-271.224	-6.03857	-256.114	-0.130924	-255.667	0.0438255
5	-255.732	-255.669	0.0248392	-255.748	-0.00614031	-255.726	0.00232105	-256.142	-0.160415	-271.247	-6.06684	-256.128	-0.15489
6	-255.768	-255.8	-0.0127201	-255.728	0.0153933	-255.741	0.0103169	-255.706	0.0240656	-256.076	-0.120447	-271.213	-6.03874
7	-255.739	-255.701	0.0145472	-255.733	0.0020793	-255.762	-0.00927543	-255.755	-0.00648313	-255.722	0.00662527	-256.149	-0.160328
8	-255.763	-255.785	-0.00882977	-255.733	0.0118512	-255.73	0.0129378	-255.721	0.0164318	-255.748	0.00592505	-255.712	0.0198985
9	-255.743	-255.719	0.0093998	-255.73	0.00507144	-255.76	-0.00643765	-255.738	0.00202365	-255.757	-0.00554098	-255.755	-0.00447219
10	-255.759	-255.774	-0.00588276	-255.734	0.00959976	-255.735	0.00939224	-255.728	0.0122206	-255.735	0.00938281	-255.724	0.0136549
11	-255.747	-255.731	0.00605841	-255.728	0.00744604	-255.755	-0.00330953	-255.734	0.00504636	-255.755	-0.00324497	-255.738	0.00340058
12	-255.756	-255.765	-0.003554	-255.736	0.00772773	-255.739	0.00646156	-255.731	0.0095704	-255.739	0.00645088	-255.73	0.0100281
13	-255.749	-255.74	0.00357817	-255.724	0.00991327	-255.751	-0.000691399	-255.73	0.00740824	-255.751	-0.000684829	-255.734	0.00610521
14	-255.754	-255.757	-0.00144315	-255.737	0.00633597	-255.743	0.00413913	-255.734	0.00771398	-255.743	0.00402749	-255.734	0.00777016
15	-255.752	-255.75	0.000847265	-255.734	0.00700883	-255.747	0.00194133	-255.735	0.00658276	-255.747	0.00180191	-255.735	0.00639776

## Sheet: Table S4
Table S4
layer	a	error (+/-)	b	error (+/-)
1	-251.703	0.0829784	-2.78555	0.024469
2	-255.984	0.117102	-2.5864	0.0345315
3	-255.785	0.126762	-2.5814	0.03738
4	-256.064	0.0693851	-2.53242	0.0204605
linear regression: y = a+b*x

## Sheet: Table S5
Table S5
	Surface energies of calcite and Mg-doped (10.4) slabs (J/m^2)
layer	calcite	1Mg	Dg%	3Mg(A)	Dg%	3Mg(B)	Dg%	6Mg	Dg%
1	0.533191	0.536096	0.544838	0.555335	4.15319	0.525978	-1.35278	0.426638	-19.9839
2	0.533191	0.512781	-3.82775	0.495609	-7.04843	0.488486	-8.38445	0.485342	-8.97393
3	0.533191	0.527145	-1.13385	0.524863	-1.56195	0.523803	-1.76072	0.532025	-0.218694
4	0.533191	0.527137	-1.13537	0.516842	-3.06616	0.516073	-3.21041	0.503924	-5.48898
5	0.533191	0.531478	-0.321251	0.530344	-0.533828	0.528944	-0.796377	0.530304	-0.54146
6	0.533191	0.527948	-0.983347	0.515458	-3.32583	0.514553	-3.49552	0.50738	-4.84072
